# Supplementary material for: Stable green and red dual-color emission in all-inorganic halide-mixed perovskite single microsheets
Source: Royal Society of Chemistry journal article supplement (doi:10.1039/d0ra02068k), 2020-01-01
Supplement: d0ra02068k1.pdf [file d0ra02068k1.pdf]

## Supporting Information for

# Stable green and red dual-emissions in the single all-inorganic halide-mixed perovskites microsheet

Manyi Zhong<sup>1</sup>, Zhuang Zhao<sup>1</sup>, Yuan Luo<sup>1</sup>, Fang Zhou<sup>3,\*</sup>, Yuehua Peng<sup>1</sup>, Yanling Yin<sup>1</sup>,  
Weichang Zhou<sup>1,2,\*</sup>, Dongsheng Tang<sup>1,2</sup>

<sup>1</sup> School of Physics and Electronics, Key Laboratory of Low-dimensional Quantum Structures and Quantum Control of Ministry of Education, Hunan Normal University, Changsha 410081, People's Republic of China

<sup>2</sup> Key Laboratory for Matter Microstructure and Function of Hunan Province, Synergetic Innovation Center for Quantum Effects and Application, Hunan Normal University, Changsha 410081, People's Republic of China

<sup>3</sup> Department of Basic Course, Hunan Police Academy, Changsha 410138, People's Republic of China

\* Corresponding Author.

E-mail: [zhoufang@smail.hunnu.edu.cn](mailto:zhoufang@smail.hunnu.edu.cn) (F. Z.), [wchangzhou@hunnu.edu.cn](mailto:wchangzhou@hunnu.edu.cn) (W. Z.)

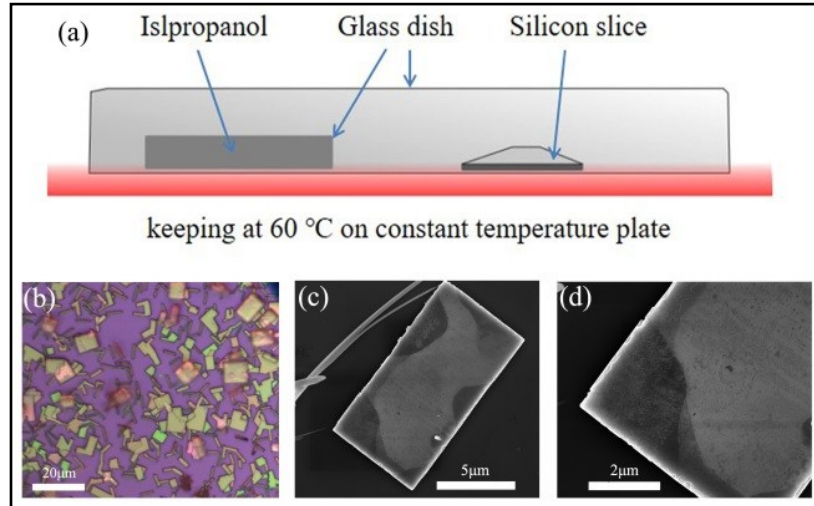

**Fig. S1** (a) Synthesis schematic diagram of CsPbBr<sub>x</sub>I<sub>3-x</sub> microsheets. (b) Optical image of as-synthesized CsPbBr<sub>x</sub>I<sub>3-x</sub> microsheets. (c-d) SEM of single CsPbBr<sub>x</sub>I<sub>3-x</sub> microsheet with different magnification.

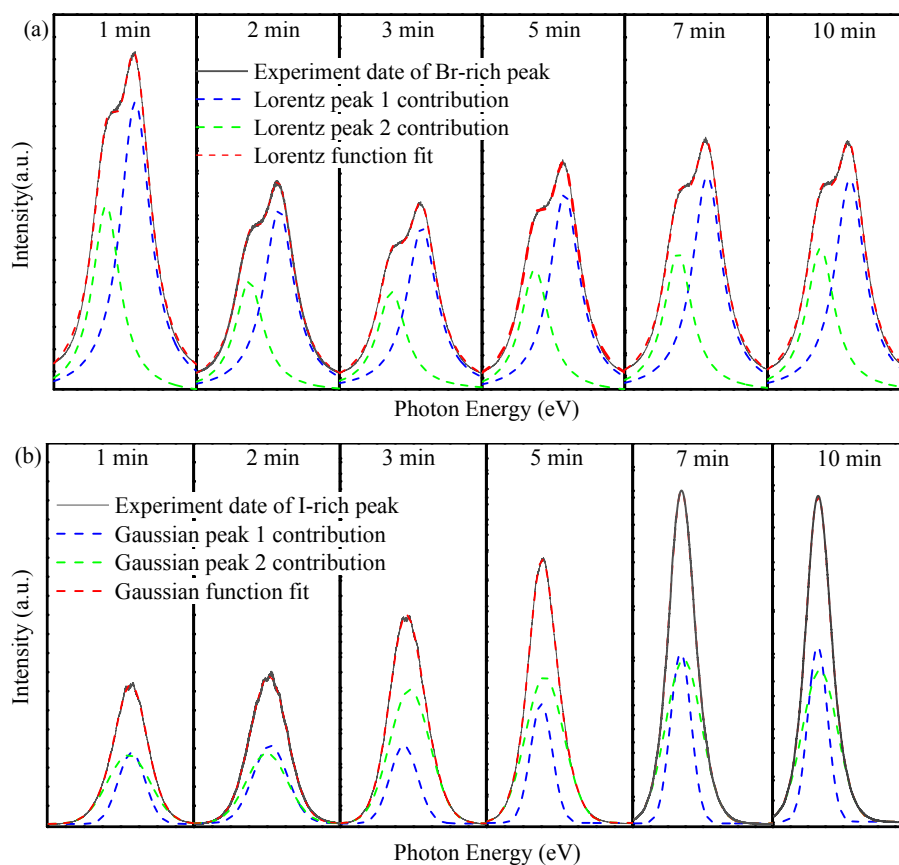

**Fig. S2** (a) Lorentz decomposition of PL spectra in the range of 2.21–2.46 eV upon 1, 2, 3, 5, 7 and 10 min laser excitation. (b) Gaussian decomposition of PL spectra in the range of 1.65–2.05 eV upon 1, 2, 3, 5, 7 and 10 min laser excitation. All fitting curves exhibit two peaks.

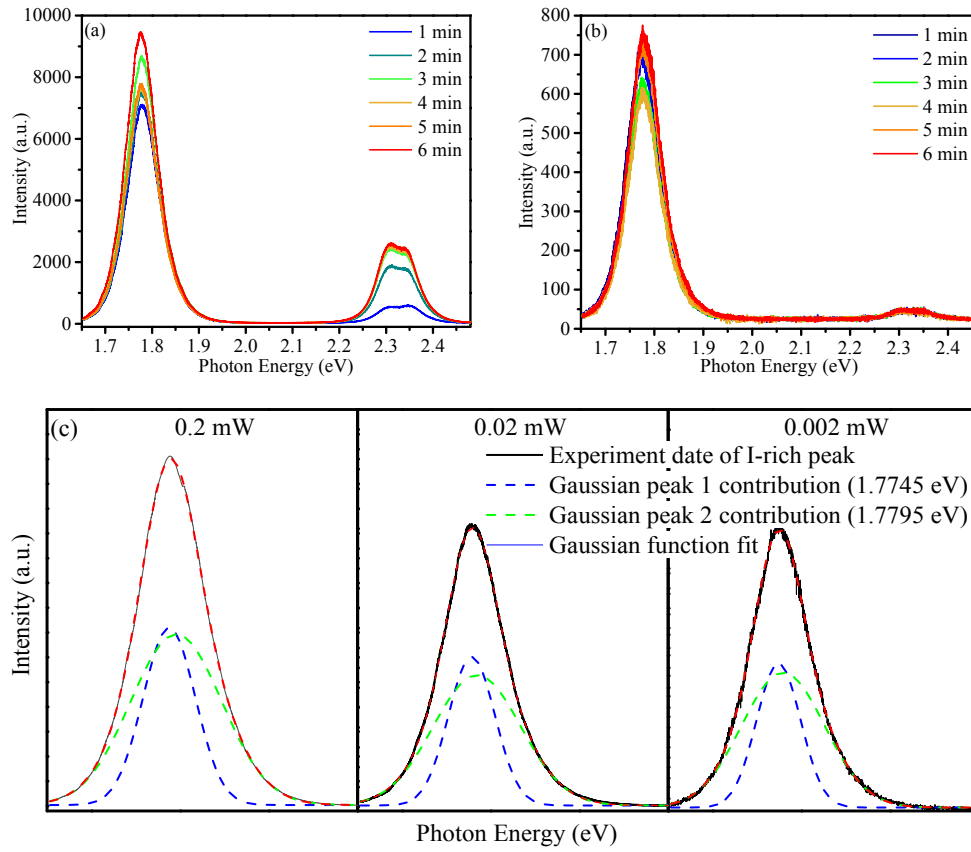

**Fig. S3** (a,b) PL spectra collected at different illumination time under the laser power of 0.3 mW and 0.03 mW ( $\lambda=355$  nm) of the same  $\text{CsPbBr}_x\text{I}_{3-x}$  micro/nanosheet in Fig. 2a. (c) Gaussian decomposition of the PL spectra in the range of 1.65–2 eV with different laser power.

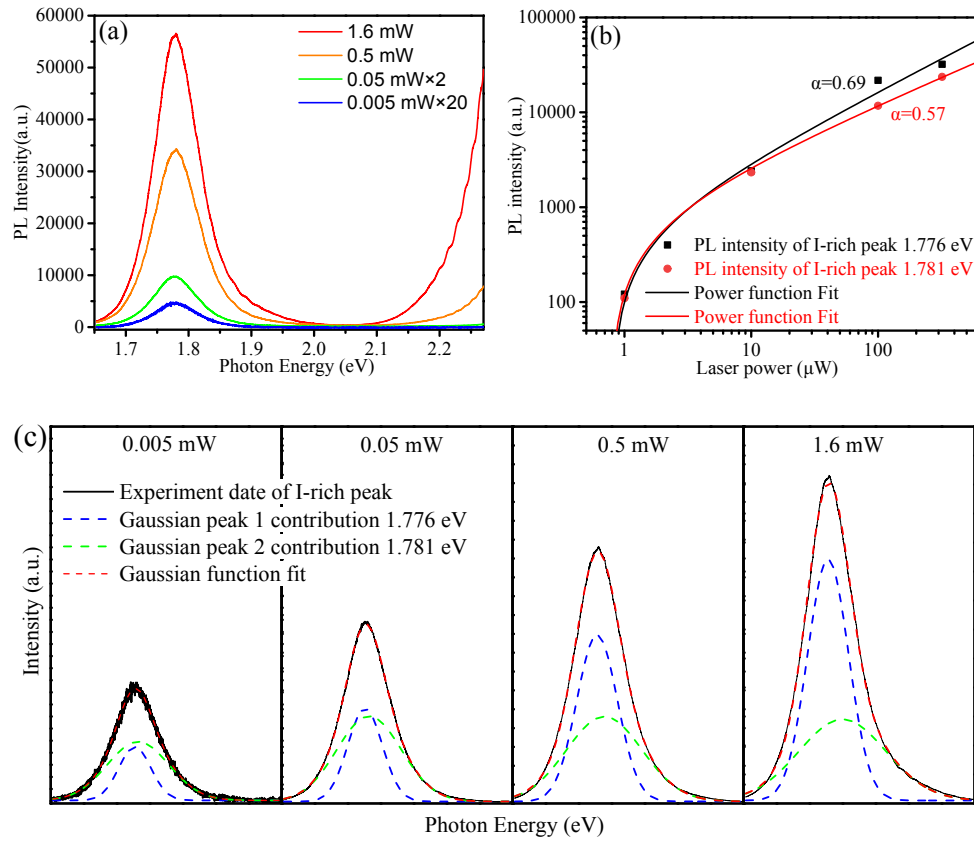

**Fig. S4** (a) Power-dependent PL spectra under excitation of 532 nm CW laser. (b) Log-log plot of PL intensity versus laser intensity for the I-rich peaks extracted from Fig. S4a (points). The solid lines are fitting curves using power function. (c) Gaussian decomposition of PL spectra in the range of 1.65–2 eV under different laser power.

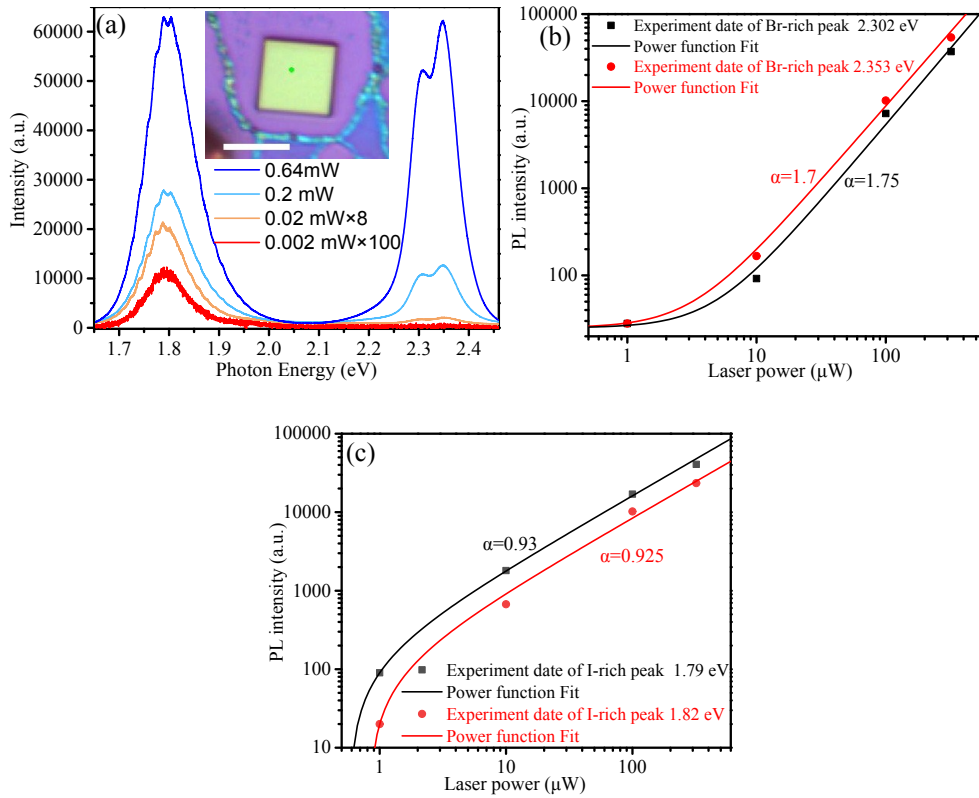

**Fig. S5** (a) Power-dependent PL spectra of another selected single CsPbBr<sub>x</sub>I<sub>3-x</sub> microsheet different from the one in main text. Inset is corresponding optical image. (b,c) Log-log plot of PL intensity versus laser power for Br-rich and I-rich peaks extracted from Fig. S5a, respectively.

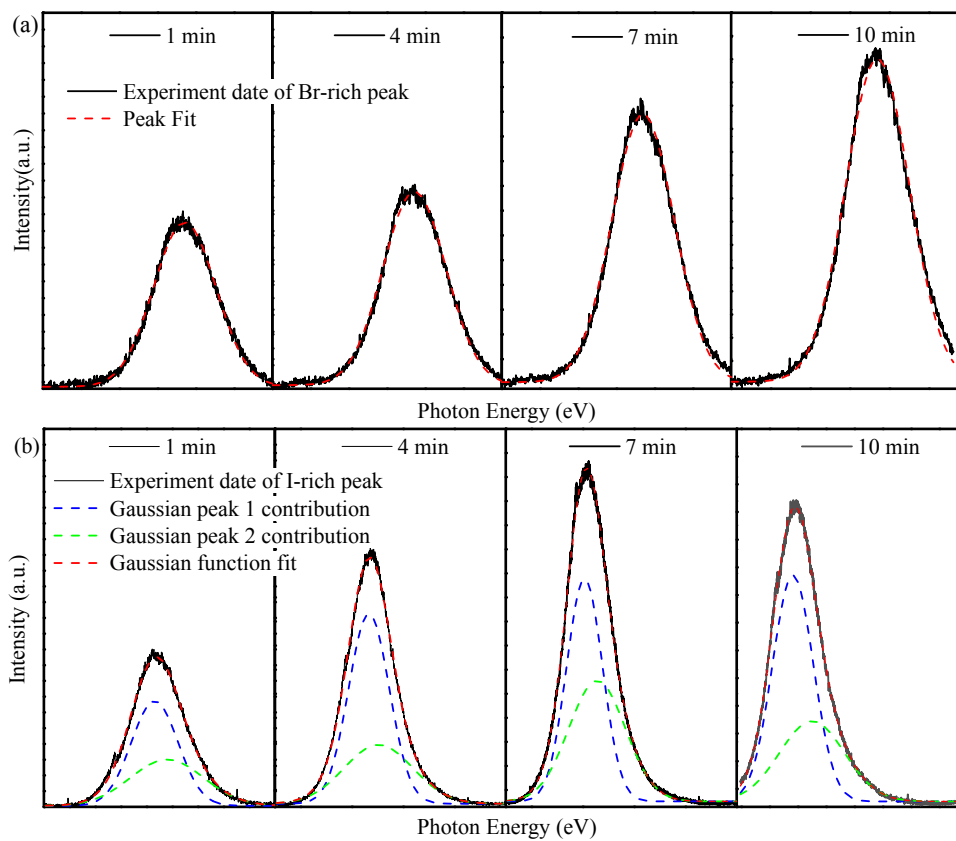

**Fig. S6** (a) Gaussian decomposition of PL spectra in the range of 2.15–2.45 eV under illumination time of 1, 4, 7 and 10 min. (b) Gaussian decomposition of PL spectra in the range of 1.65–2.1 eV under illumination time of 1, 4, 7 and 10 min.

Table S1. The corresponding lifetime constants and amplitudes of Br-rich peaks.

|        | $A_1$ | $\tau_{Br}^1$ (ns) | $A_2$ | $\tau_{Br}^2$ (ns) |
|--------|-------|--------------------|-------|--------------------|
| 1 min  | 40.6% | 5.75               | 59.4% | 1.33               |
| 4 min  | 64.4% | 4.987              | 35.6% | 1.39               |
| 7 min  | 66.1% | 6.649              | 33.9% | 1.518              |
| 10 min | 65.9% | 7.546              | 34.1% | 1.881              |

Table S2. The corresponding lifetime constants and amplitudes of I-rich peaks.

|        | $A_1$  | $\tau_I^1$ (ns) | $A_2$   | $\tau_I^2$ (ns) | $A_3$  | $\tau_I^3$ (ns) |
|--------|--------|-----------------|---------|-----------------|--------|-----------------|
| 1 min  | 240.6% | 4.337           | -128.2% | 3.655           | -12.4% | 0.49            |
| 4 min  | 198.9% | 6.374           | -69.3%  | 7.452           | -29.6% | 4.67            |
| 7 min  | 104.3% | 7.26            | -11.5%  | 10.4            | 7.2%   | 3.21            |
| 10 min | 95.2%  | 7.72            | -8.8%   | 11.2            | 13.6%  | 2.44            |



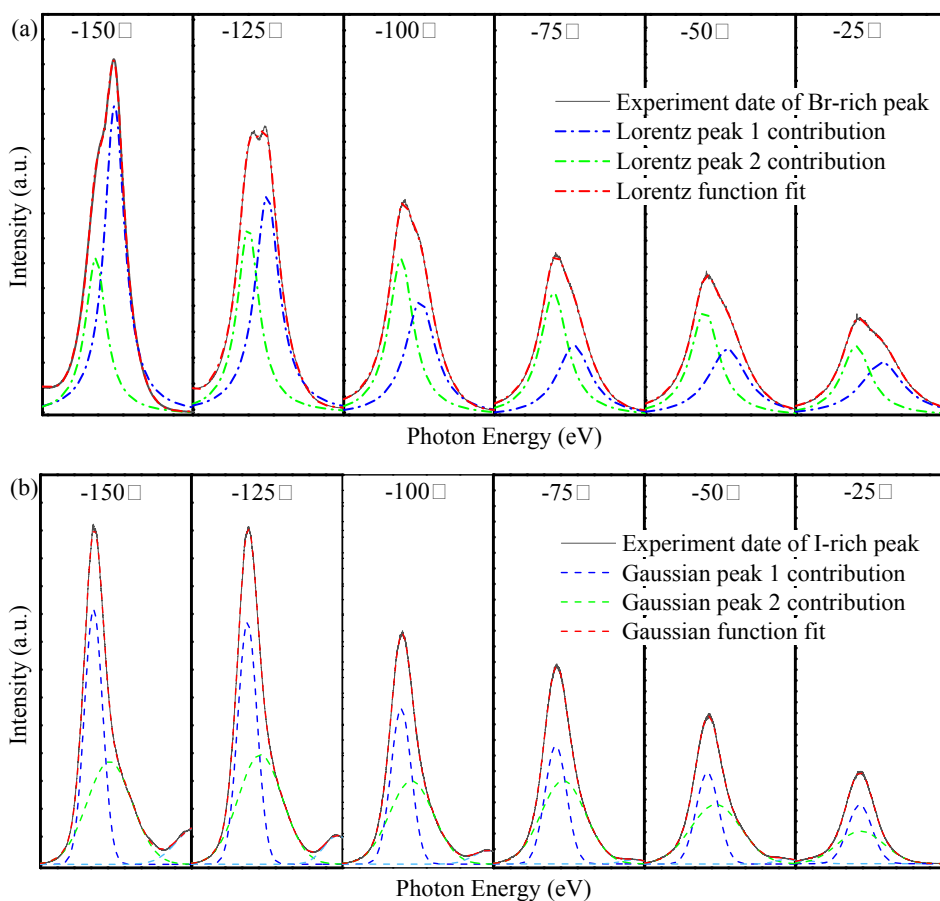

**Fig. S7** (a) Lorentz decomposition of PL spectra in the range of 2.27–2.42 eV at temperature of  $-25\text{ }^{\circ}\text{C}$ ,  $-50\text{ }^{\circ}\text{C}$ ,  $-75\text{ }^{\circ}\text{C}$ ,  $-100\text{ }^{\circ}\text{C}$ ,  $-125\text{ }^{\circ}\text{C}$  and  $-150\text{ }^{\circ}\text{C}$ . (b) Gaussian decomposition of PL spectra in the range of 1.75–2.2 eV at temperature of  $-25\text{ }^{\circ}\text{C}$ ,  $-50\text{ }^{\circ}\text{C}$ ,  $-75\text{ }^{\circ}\text{C}$ ,  $-100\text{ }^{\circ}\text{C}$ ,  $-125\text{ }^{\circ}\text{C}$  and  $-150\text{ }^{\circ}\text{C}$ . All the fitting curves exhibit two peaks.
